# Supplementary material for: SLC35A2 Deficiency Promotes an Epithelial-to-Mesenchymal Transition-like Phenotype in Madin–Darby Canine Kidney Cells
Source: MDPI journal article supplement (doi:10.3390/cells11152273), 2022-07-23
Supplement: s1 [file s1]

Supplementary Materials

# SLC35A2 Deficiency Promotes an Epithelial-to-Mesenchymal Transition-Like Phenotype in Madin-Darby Canine Kidney Cells

Magdalena Kot <sup>1,†</sup>, Ewa Mazurkiewicz <sup>1,†</sup>, Maciej Wiktor <sup>2</sup>, Wojciech Wiertelak <sup>2</sup>, Antonina Joanna Mazur <sup>1</sup>, Andrei Rahalevich <sup>2</sup>, Mariusz Olczak <sup>2</sup> and Dorota Maszczak-Seneczko <sup>2,\*</sup>

<sup>1</sup> Department of Cell Pathology, Faculty of Biotechnology, University of Wrocław, 14A F. Joliot-Curie St., 50-383 Wrocław, Poland; magdalena.kot@uwr.edu.pl (M.K.); ewa.mazurkiewicz@uwr.edu.pl (E.M.); antonina.mazur@uwr.edu.pl (A.J.M.)

<sup>2</sup> Department of Biochemistry, Faculty of Biotechnology, University of Wrocław, 14A F. Joliot-Curie St., 50-383 Wrocław, Poland; maciej.wiktor@uwr.edu.pl (M.W.); wojciech.wiertelak@uwr.edu.pl (W.W.); andrrag2000@gmail.com (A.R.); mariusz.olczak@uwr.edu.pl (M.O.)

\* Correspondence: dorota.maszczak-seneczko@uwr.edu.pl

† These authors contributed equally to this work.

**Table S1.** List of reagents used in immunofluorescence and fluorescence stainings.

| Reagent                                    | Vendor                   | Dilution     |
|--------------------------------------------|--------------------------|--------------|
| Rabbit anti-SLC35A2 (HPA036087)            | Sigma-Aldrich            | 1:100        |
| Mouse anti-FTCD (C-1)                      | Santa Cruz Biotechnology | 1:25         |
| Mouse anti-vimentin (V9)                   | Sigma-Aldrich            | 1:500        |
| Mouse anti-GM130 (35/GM130)                | BD Biosciences           | 1:100        |
| Mouse anti-γ-adaptin (100/3)               | Sigma-Aldrich            | 1:500        |
| Goat anti-mouse IgG Alexa Fluor Plus 555   | Thermo Fisher Scientific | 1:200-1:1000 |
| Goat anti-rabbit IgG Alexa Fluor Plus 488  | Thermo Fisher Scientific | 1:1000       |
| Phalloidin conjugated with Alexa Fluor 568 | Thermo Fisher Scientific | 1:100        |

**Table S2.** List of antibodies used in western blotting experiments. <sup>1,2</sup>Solutions used for blocking and incubation with both primary and secondary antibodies. 15% BSA in TBS with 0.2% Tween 20; 25% non-fat dried milk in PBS with 0.2% Tween 20.

| Antibody                                     | Vendor                    | Dilution       |
|----------------------------------------------|---------------------------|----------------|
| Rabbit anti-E-cadherin (24E10) <sup>1</sup>  | Cell Signaling Technology | 1:1000         |
| Rabbit anti-N-cadherin (D4R1H) <sup>1</sup>  | Cell Signaling Technology | 1:500          |
| Mouse anti-vimentin (V9) <sup>2</sup>        | Sigma-Aldrich             | 1:10000        |
| Mouse anti-FTCD (C-1) <sup>1</sup>           | Santa Cruz Biotechnology  | 1:500          |
| Mouse anti-fibronectin (1G10F9) <sup>1</sup> | Proteintech               | 1:1000         |
| Rabbit anti-ZEB1 <sup>1</sup>                | Proteintech               | 1:1000         |
| Rabbit anti-Slug (C19G7) <sup>1</sup>        | Cell Signaling Technology | 1:500          |
| Rabbit anti-Snail (C15D3) <sup>1</sup>       | Cell Signaling Technology | 1:1000         |
| Goat anti-mouse IgG-HRP <sup>1/2</sup>       | Proteintech               | 1:5000-1:10000 |
| Goat anti-rabbit IgG-HRP <sup>1</sup>        | Sigma-Aldrich             | 1:5000-1:10000 |

**Table S3.** List of primer sequences used in qPCR experiments.

| Protein name | Forward primer sequence    | Reverse primer sequence    |
|--------------|----------------------------|----------------------------|
| E-cadherin   | 5'-AAAACCCACAGCCTCATGTC-3' | 5'-CACCTGGTCCTTGTTCTGGT-3' |
| N-cadherin   | 5'-CCCAAGACAAGCGACTAAGC-3' | 5'-TGACAGCTGACCTGAGATGG-3' |
| Fibronectin  | 5'-GGTTTCCCATTATGCCATTG-3' | 5'-TTCCAAGACATGTGCAGCTC-3' |
| Vimentin     | 5'-CCGACAGGATGTTGACAATG-3' | 5'-TCAGAGAGGTCGGCAAACCT-3' |
| GAPDH        | 5'-AACATCATCCCTGCTTCCAC-3' | 5'-GACCACCTGGTCCTCAGTGT-3' |

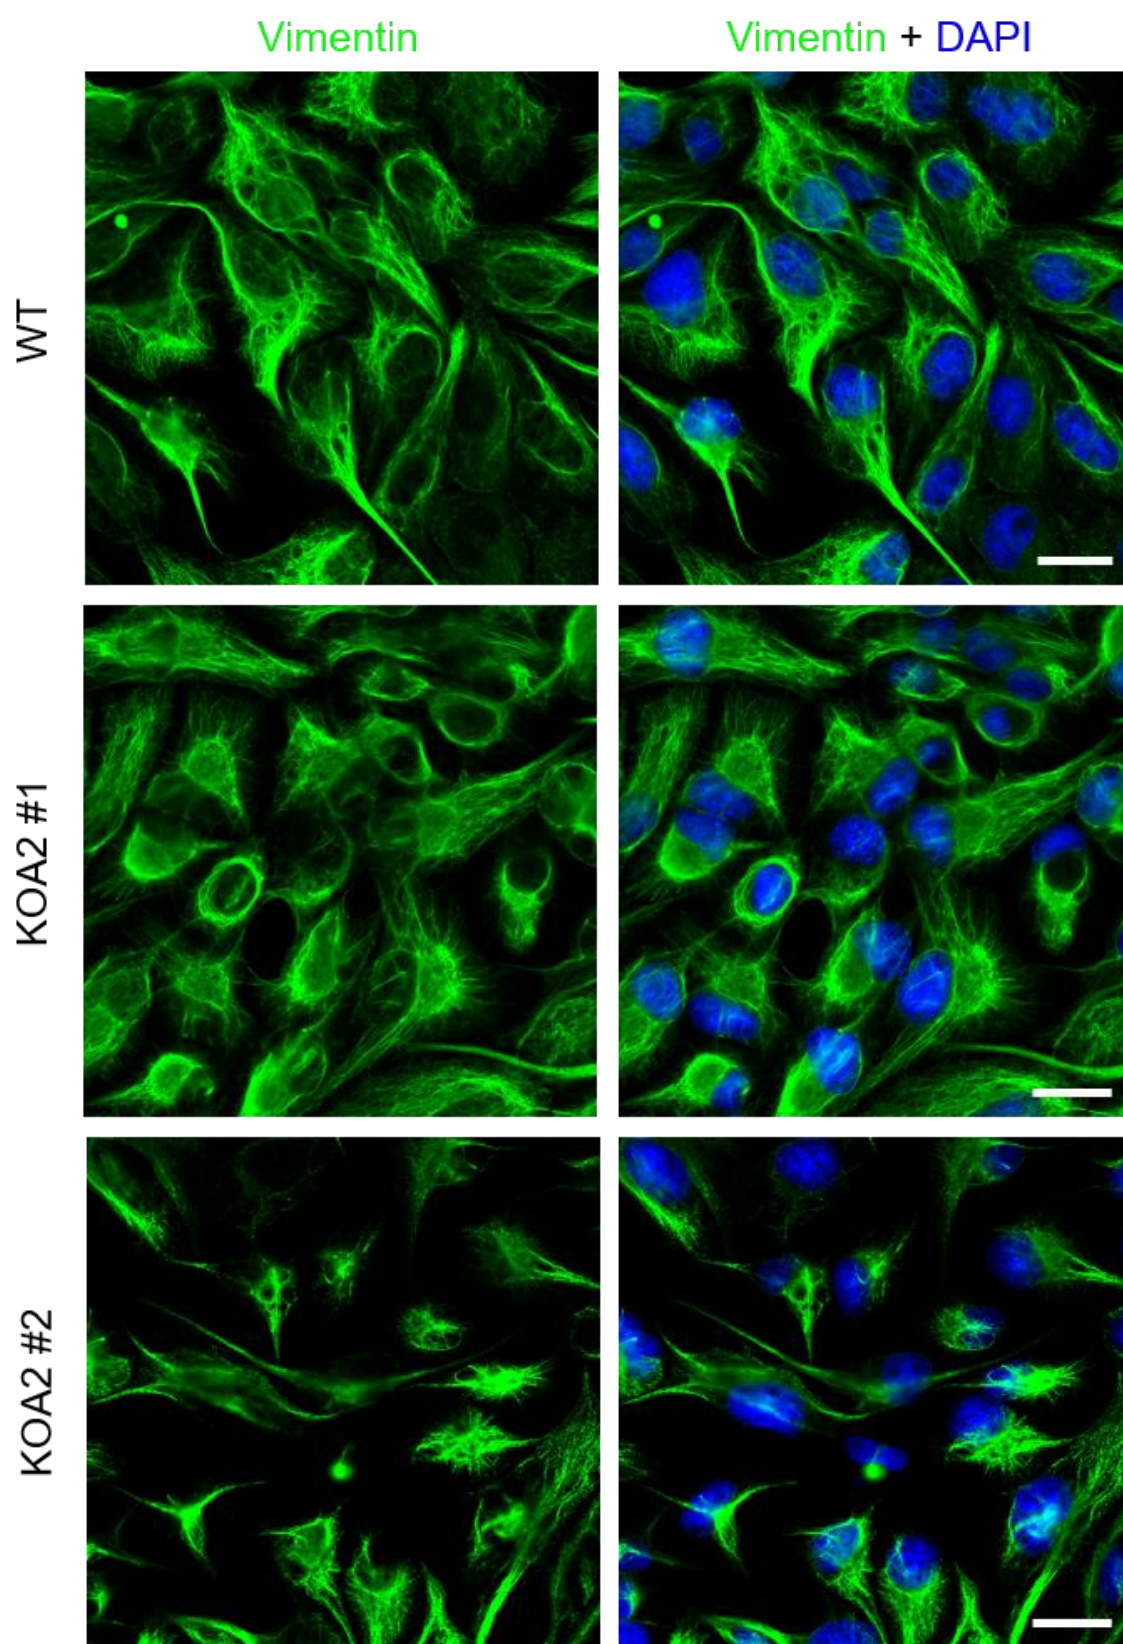

**Figure S1.** Images of the wild-type and *SLC35A2* knockout MDCK cells stained with anti-vimentin antibody. Vimentin is shown in green and cell nuclei are shown in blue. Scale bar corresponds to 20  $\mu\text{m}$ .

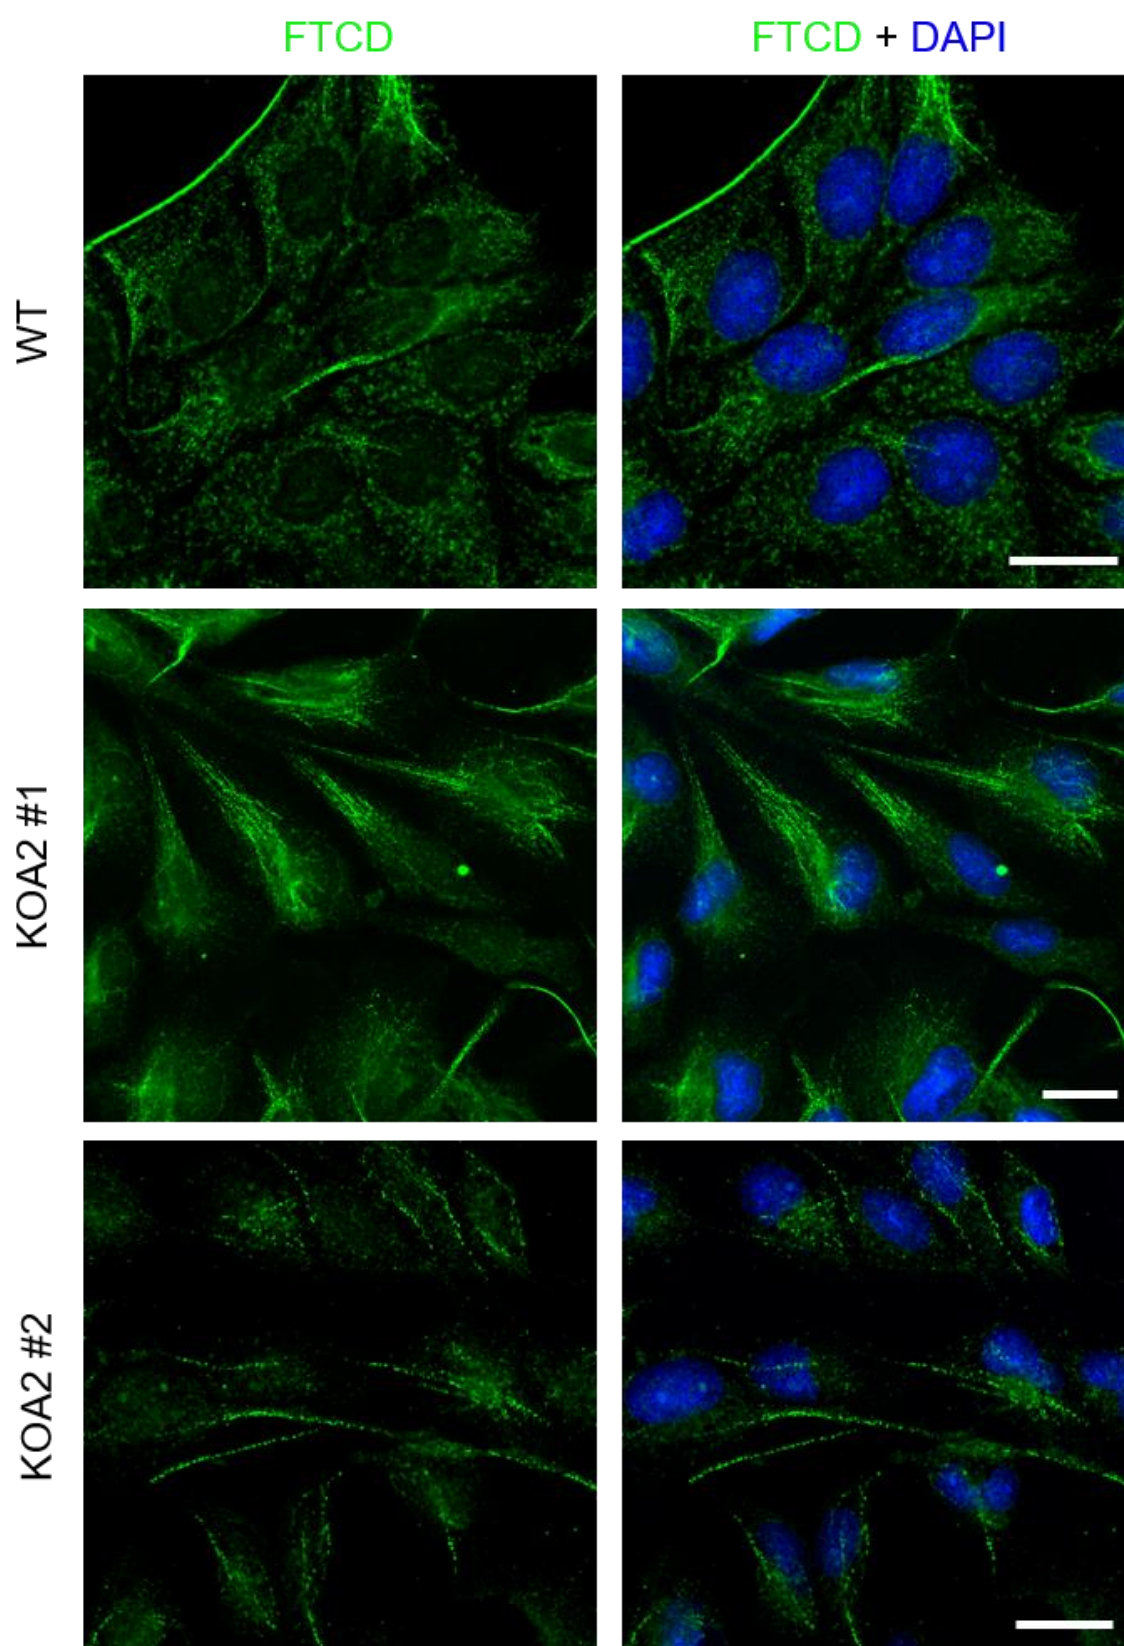

**Figure S2.** Images of the wild-type and *SLC35A2* knockout MDCK cells stained with anti-FTCD antibody. FTCD is shown in green and cell nuclei are shown in blue. Scale bar corresponds to 20  $\mu\text{m}$ .



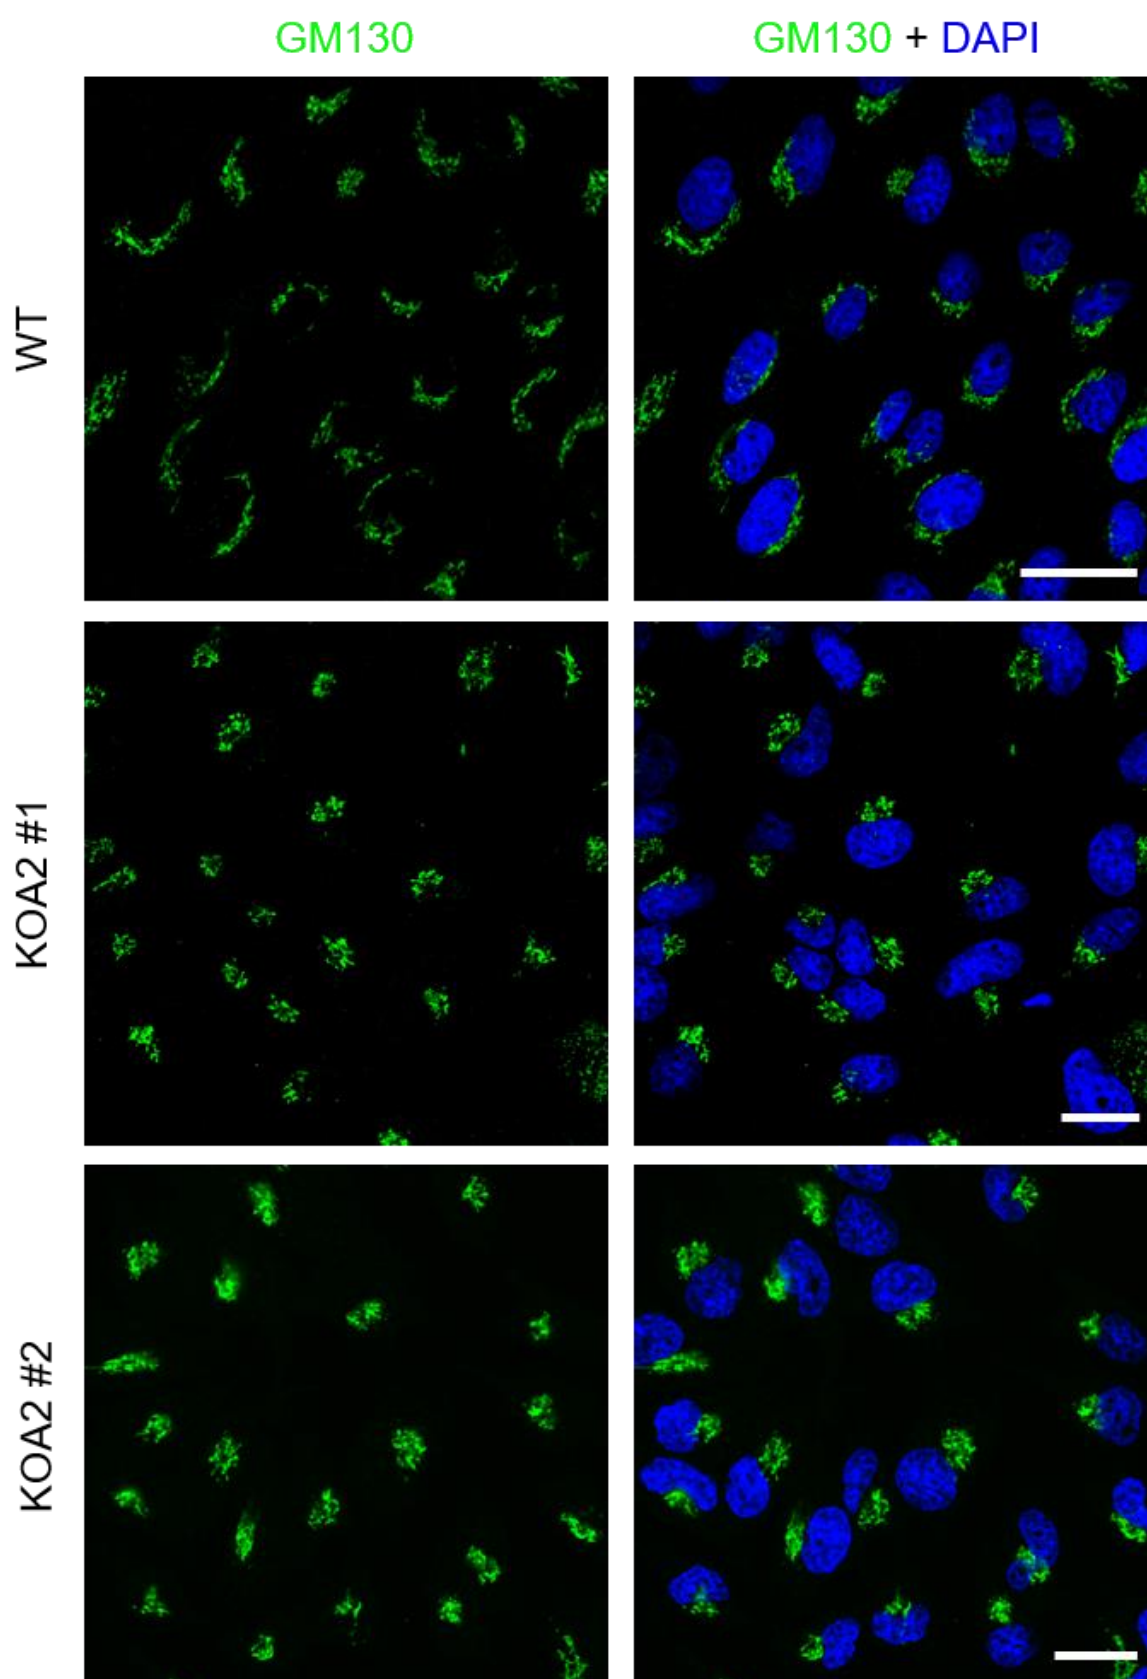

**Figure S3.** Images of the wild-type and *SLC35A2* knockout MDCK cells stained with anti-GM130 antibody. GM130 is shown in green and cell nuclei are shown in blue. Scale bar corresponds to 20  $\mu\text{m}$ .

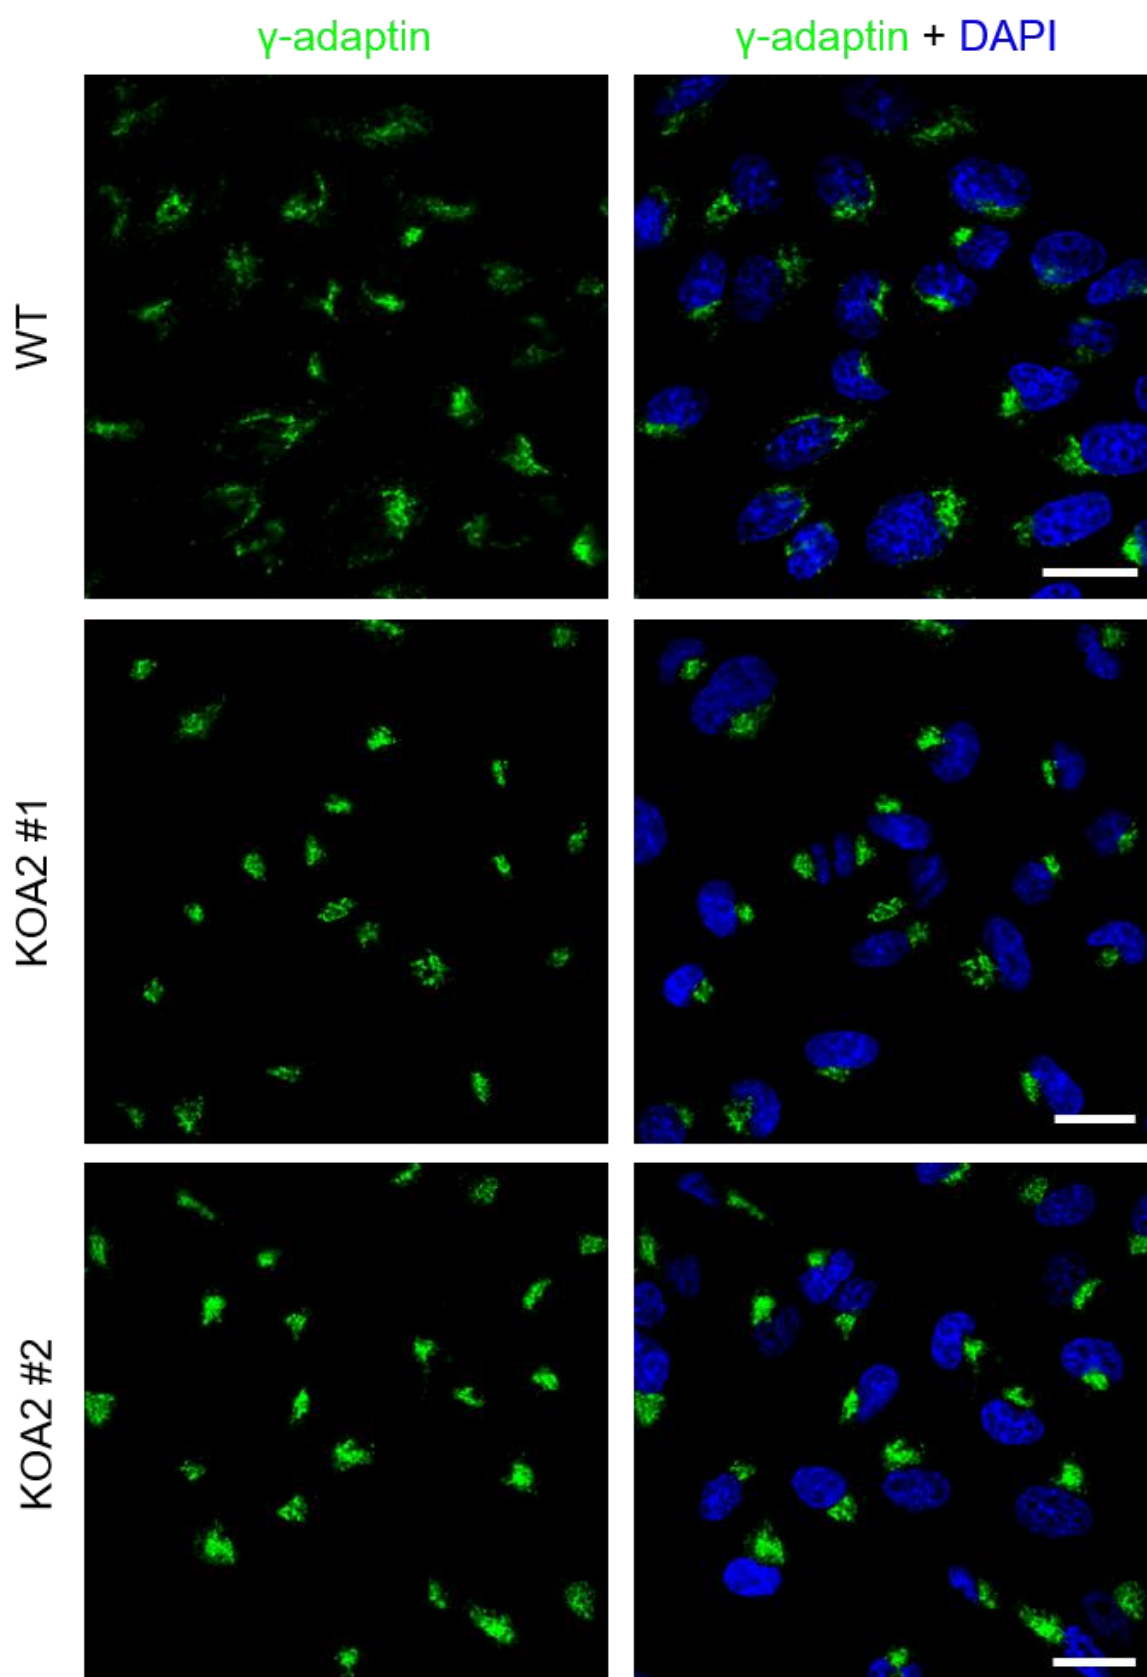

**Figure S4.** Images of the wild-type and *SLC35A2* knockout MDCK cells stained with anti- $\gamma$ -adaptin antibody.  $\gamma$ -adaptin is shown in green and cell nuclei are shown in blue. Scale bar corresponds to 20  $\mu$ m.
